# Supplementary material
Source: PubMed Central journal article supplement (PMC4879116)
Supplement: NIHMS727207-supplement-Supp_TableS1-S2.pdf [file NIHMS727207-supplement-Supp_TableS1-S2.pdf]

Extra tables for “Phthalate exposure and semen quality in fertile US men” by Thurston et al. (June 2015)

|                                           | In sample, n=420 |        |        |       |         | Not in sample, n=535 |        |        |       |         | p    |
|-------------------------------------------|------------------|--------|--------|-------|---------|----------------------|--------|--------|-------|---------|------|
|                                           | n                | mean   | SD     | min   | max     | n                    | mean   | SD     | min   | max     |      |
| Age (years)                               | 420              | 31.87  | 6.12   | 18.40 | 53.20   | 526                  | 31.59  | 5.95   | 18.20 | 51.60   | 0.48 |
| Abstinence time (hours)                   | 420              | 77.48  | 29.87  | 9.28  | 226.67  | 368                  | 122.84 | 383.90 | 9.67  | 5787.38 | 0.02 |
| Time to start semen analysis (hours)      | 420              | 26.82  | 9.80   | 0.00  | 90.00   | 383                  | 28.03  | 11.74  | 3.00  | 92.00   | 0.11 |
| Time to complete semen analysis (minutes) | 420              | 58.49  | 9.44   | 24.00 | 97.00   | 379                  | 64.23  | 18.29  | 32.00 | 190.00  | 0.00 |
| Sperm concentration ( $10^6$ /ml)         | 420              | 66.12  | 45.02  | 2.90  | 316.00  | 382                  | 65.38  | 47.50  | 2.90  | 354.10  | 0.82 |
| Sperm motility (%)                        | 420              | 51.77  | 11.80  | 10.50 | 77.50   | 383                  | 49.81  | 11.71  | 5.00  | 78.00   | 0.02 |
| Morphology (%)                            | 420              | 10.74  | 5.21   | 0.50  | 26.00   | 382                  | 10.79  | 4.91   | 0.50  | 25.00   | 0.90 |
| Total sperm count ( $10^6$ )              | 419              | 297.36 | 211.38 | 6.47  | 1218.00 | 378                  | 305.75 | 284.40 | 3.31  | 2456.13 | 0.63 |
| Total motile sperm count ( $10^6$ )       | 419              | 133.84 | 102.54 | 0.54  | 627.25  | 379                  | 128.02 | 120.44 | 0.85  | 1042.82 | 0.46 |
| Creatinine concentration (mg/dl)          | 420              | 143.15 | 80.60  | 7.40  | 509.30  | 21                   | 147.75 | 80.18  | 23.60 | 280.50  | 0.80 |
| Center: CA                                | 420              | 0.27   | 0.45   | 0.00  | 1.00    | 383                  | 0.20   | 0.40   | 0.00  | 1.00    | 0.01 |
| Center: MN                                | 420              | 0.30   | 0.46   | 0.00  | 1.00    | 383                  | 0.23   | 0.42   | 0.00  | 1.00    | 0.03 |
| Center: MO                                | 420              | 0.21   | 0.41   | 0.00  | 1.00    | 383                  | 0.31   | 0.46   | 0.00  | 1.00    | 0.00 |
| Center: NY                                | 420              | 0.04   | 0.20   | 0.00  | 1.00    | 383                  | 0.07   | 0.25   | 0.00  | 1.00    | 0.16 |
| Center: IA                                | 420              | 0.17   | 0.38   | 0.00  | 1.00    | 383                  | 0.19   | 0.40   | 0.00  | 1.00    | 0.48 |
| Race: black                               | 420              | 0.08   | 0.28   | 0.00  | 1.00    | 530                  | 0.07   | 0.25   | 0.00  | 1.00    | 0.31 |
| Current smoker                            | 420              | 0.22   | 0.41   | 0.00  | 1.00    | 526                  | 0.20   | 0.40   | 0.00  | 1.00    | 0.47 |
| Stress                                    | 420              | 0.24   | 0.43   | 0.00  | 1.00    | 530                  | 0.19   | 0.40   | 0.00  | 1.00    | 0.10 |
| Recent fever                              | 420              | 0.02   | 0.14   | 0.00  | 1.00    | 530                  | 0.05   | 0.22   | 0.00  | 1.00    | 0.01 |

Table 1: Characteristics of study population, partners of pregnant women in five US cities, compared to subjects from study population who were not included in the analysis. P-values are from a t-test comparing subjects in and not in the analysis.

|            | CA, n=114 |      | MN, n=127 |      | MO, n=88 |      | NY, n=18 |      | IA, n=73 |      |      |
|------------|-----------|------|-----------|------|----------|------|----------|------|----------|------|------|
|            | mean      | SD   | mean      | SD   | mean     | SD   | mean     | SD   | mean     | SD   | p    |
| mehp       | -0.17     | 1.03 | -0.15     | 0.90 | 0.25     | 1.29 | 1.44     | 1.52 | -0.14    | 1.05 | 0.00 |
| mehhp      | -0.26     | 0.99 | 0.01      | 0.81 | 0.12     | 1.18 | 1.31     | 1.48 | -0.08    | 1.09 | 0.00 |
| meohp      | -0.27     | 1.01 | -0.02     | 0.80 | 0.11     | 1.16 | 1.38     | 1.41 | -0.02    | 1.06 | 0.00 |
| mecpp      | -0.22     | 0.91 | 0.03      | 0.80 | 0.08     | 1.04 | 1.19     | 1.28 | -0.10    | 1.01 | 0.00 |
| molar.DEHP | -0.23     | 0.93 | 0.00      | 0.77 | 0.11     | 1.11 | 1.28     | 1.37 | -0.09    | 1.02 | 0.00 |
| mbp        | -0.10     | 0.83 | 0.09      | 0.73 | -0.08    | 0.76 | 0.27     | 0.64 | 0.02     | 0.72 | 0.14 |
| mibp       | -0.16     | 1.09 | 0.08      | 0.91 | -0.14    | 0.78 | 0.58     | 0.63 | 0.14     | 0.97 | 0.01 |
| mcpp       | -0.22     | 0.97 | 0.30      | 0.72 | 0.05     | 0.67 | -0.24    | 0.61 | -0.17    | 0.70 | 0.00 |
| mbzp       | -0.26     | 1.09 | 0.01      | 0.83 | 0.20     | 0.86 | 0.15     | 1.02 | 0.11     | 0.81 | 0.01 |
| mep        | 0.46      | 1.29 | -0.21     | 1.27 | -0.20    | 1.35 | 0.52     | 1.66 | -0.23    | 1.25 | 0.00 |

Table 2: Distributions of  $\ln(\text{phthalate})$ , adjusted for  $\ln(\text{creatinine})$  by center. P-values are from the 4 degree of freedom ANOVA comparing means across the 5 centers.
